# Supplementary material
Source: HighWire-hosted journal article supplement (https://www.cmajopen.ca/highwire/filestream/81380/field_highwire_adjunct_files/0/2019-0072-1-at.pdf)
Supplement: 2019-0072-1-at.pdf [file 2019-0072-1-at.pdf]

## Appendix 1 (as supplied by the authors): Focus Group Questions for PCPs

1. What is your present practice setting?
  - a. In what ways, in your current practice setting, is it difficult to manage patients with morbid obesity? Explain why?
  - b. How long have you been practicing in your current geographical setting?
  - c. What allied health professional do you have access to if managing patients with morbid obesity? Specify
  
2. Can you describe your past experience in managing patients with morbid obesity?
  - a. What positive experiences have you had in managing patients with morbid obesity?
  - b. What are the challenges you have experienced in managing patients with morbid obesity?
  
3. How are your experiences different in managing patients with morbid obesity and difficult to manage diabetes (T2DM)?
  - a. To what extent does your practice setting support managing these patients?
  
4. What additional resources would be helpful to you in your practice that would better prepare you to refer patients?
  
5. For patients with morbid obesity, what types of care plans do/would you suggest to manage the weight?

6. In general, what treatment interventions in regards to their weight loss do you think are most effective for patients with morbid obesity? Why?
7. For patients with morbid obesity and T2DM, what types of care plans do/would you suggest to manage the weight and T2DM?
8. In general, what treatment interventions in regards to weight loss and T2DM do you think are most effective for patients with morbid obesity and T2DM? Why?
9. Have you ever referred a patient for medical weight loss? Why or Why not?
  - a. What makes the referral process easy?
  - b. What are some of the barriers to referring patients for medical weight loss?  
(Probe: process issues, patient issues, beliefs, wait lists)
10. Have you ever referred a patient for weight loss (bariatric) surgery? Why or why not?
  - a. What makes the referral process easy? (Probe: types of supports)
  - b. What are some of the barriers to referring patients for weight loss surgery?
11. What types of professional development have you had related to the management of morbid obesity?
  - a. To what extent has this PD been helpful?
  - b. Was this education certified or accredited?

12. What types of Continuing Professional Development about management of morbid obesity do you think is important for your practice?

- a. What areas regarding morbid obesity and weight-related health issues would you like to learn more about, if any?
- b. What types of treatment interventions would you like to learn more about, if any?

13. Is there anything else you would like to add that we have not already discussed?
